# Supplementary material
Source: publisher figshare collection journal article supplement (https://tandf.figshare.com/articles/dataset/_/3487733)
Supplement: Supplementary file 1 [file 1]

Archive with 3 entries (3 files):
- tbsd_a_1195283_sm7059.pdf
- tbsd_a_1195283_sm7058.pdf
- tbsd_a_1195283_sm7056.doc
