# Supplementary material
Source: publisher figshare collection journal article supplement (https://tandf.figshare.com/articles/dataset/_/3487733)
Supplement: Supplementary file 1 [file 1 › tbsd_a_1195283_sm7058.pdf]

SUPPLEMENTARY MATERIAL TABLE A. Free energies of binding ( $\Delta G$ ) In silico in kcal/mol in trypanothione and glutathione reductases by both Q and NADPH sites.

| Molecule         | Trypanothione Reductase       |                                   | Glutathione Reductase         |                                   |
|------------------|-------------------------------|-----------------------------------|-------------------------------|-----------------------------------|
|                  | $\Delta G$ In silico (Q site) | $\Delta G$ In silico (NADPH site) | $\Delta G$ In silico (Q site) | $\Delta G$ In silico (NADPH site) |
| Naphthoquinones  |                               |                                   |                               |                                   |
| Nq-a             | -10.08                        |                                   | -10.5                         |                                   |
| Nq-b             | -11.7                         | -10.0                             | -11.1                         | -10.8                             |
| Nq-c             | -11.6                         | -9.7                              | -11.4                         | -10.1                             |
| Nq-d             | -11.0                         |                                   | -11.8                         |                                   |
| Nq-e             | -12.5                         | -9.7                              | -12.6                         | -11.6                             |
| Nq-f             | -12.1                         |                                   | -11.9                         |                                   |
| Nq-g             | -12.2                         | -6.2                              | -10.9                         | -10.7                             |
| Nq-h             | -13.4                         | -7                                | -11.6                         | -12.4                             |
| Nq-i             | -12.1                         | -8.6                              | -11.7                         | -10.6                             |
| Nq-j             | -9.97                         | -8.5                              | -11.2                         | -11.0                             |
| Furanquinones    |                               |                                   |                               |                                   |
| Fq-a             | -11.1                         | -8.2                              | -12.2                         | -10.1                             |
| Fq-b             | -12.8                         | -9.3                              | -13.1                         | -10.1                             |
| Fq-c             | -11.3                         | -8.5                              | -12.5                         | -10.2                             |
| Quinolinquinones |                               |                                   |                               |                                   |
| Qq-b             | -11.7                         |                                   | -10.7                         |                                   |
| Qq-c             | -12.0                         | -9.0                              | -10.9                         | -10.8                             |
| Qq-d             | -12.7                         | -10.0                             | -12.1                         | -10.7                             |
| Qq-e             | -11.2                         | -10.0                             | -11.5                         | -10.7                             |
| Qq-g             | -12.7                         | -5.2                              | -11.8                         | -9.8                              |
| Qq-i             | -12.5                         | -9.1                              | -12.2                         | -10.3                             |
